# Supplementary material for: The evaluation of the chemical quality and UV overall components dissolution consistency ofFlos Chrysanthemi Indicipreparation
Source: Royal Society of Chemistry journal article supplement (doi:10.1039/d1ay00994j), 2021-01-01
Supplement: d1ay00994j1.pdf [file d1ay00994j1.pdf]

**Evaluation of chemical quality and UV overall components dissolution consistency of *Flos Chrysanthemi Indici* preparation**

**Tingting Dai, Yantong Chen, Guoxiang Sun\***

School of Pharmacy, Shenyang Pharmaceutical University, Shenyang, Liaoning 110032, China

\* Correspondence: gxswmwys@163.com (Guoxiang Sun)

**Table S1** Quality Grade of SQFM

| Quality Grade | 1      | 2      | 3      | 4      | 5      | 6      | 7      | 8     |
|---------------|--------|--------|--------|--------|--------|--------|--------|-------|
| $S_m \geq$    | 0.95   | 0.9    | 0.85   | 0.8    | 0.7    | 0.6    | 0.5    | <0.50 |
| $P_m \leq$    | 95~105 | 90~110 | 85~115 | 80~120 | 70~130 | 60~140 | 50~150 | 0~∞   |
| $\alpha \leq$ | 0.05   | 0.1    | 0.15   | 0.2    | 0.3    | 0.4    | 0.5    | >0.50 |

**Table S2** Results of attribution of active ingredient UV spectrum

| Para.    | HCTZ | RT   | FCI  | Sum <sup>a</sup> | S15   |
|----------|------|------|------|------------------|-------|
| $P_m \%$ | 18.0 | 61.8 | 19.8 | 99.6             | 100.0 |

<sup>a</sup>. Sum is the total value of  $P_m \%$  of HCTZ, RT and FCI.

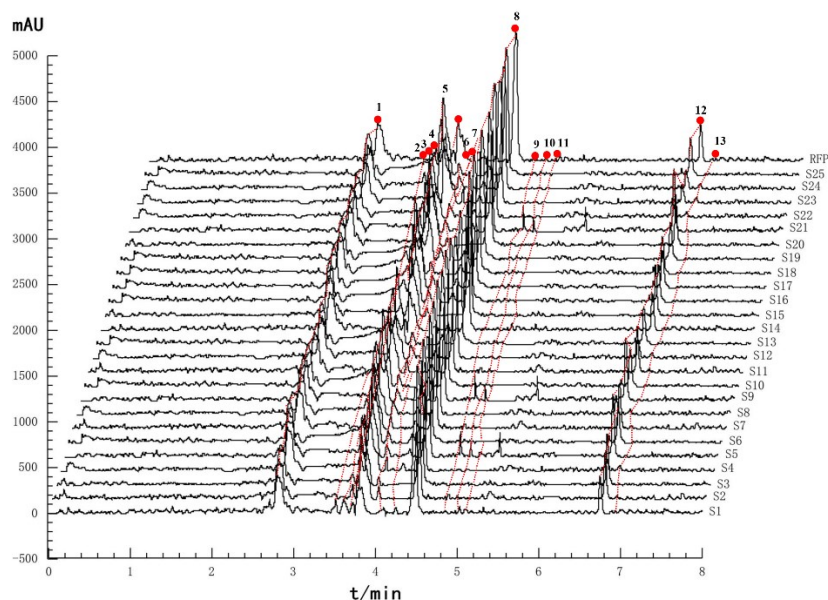

**Fig. S1** Capillary electrophoresis fingerprints of 25 batches of FCIP samples and their reference fingerprint (RFP)

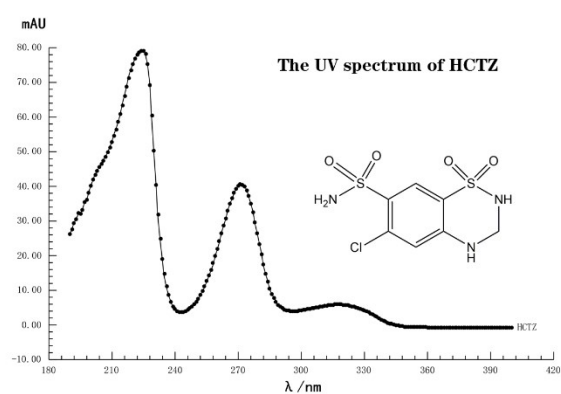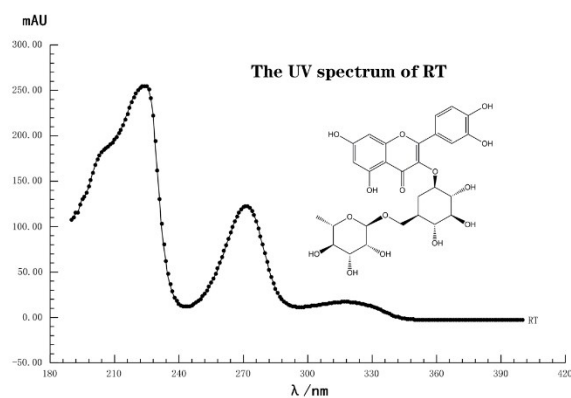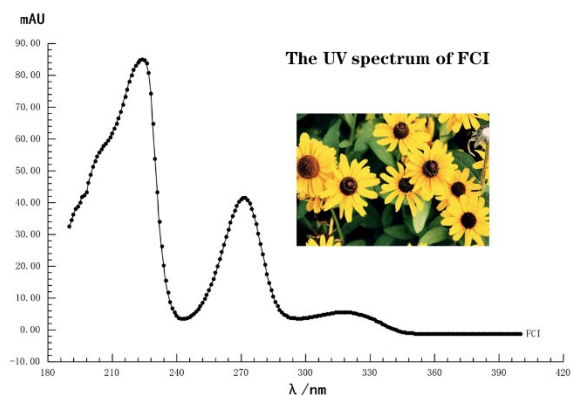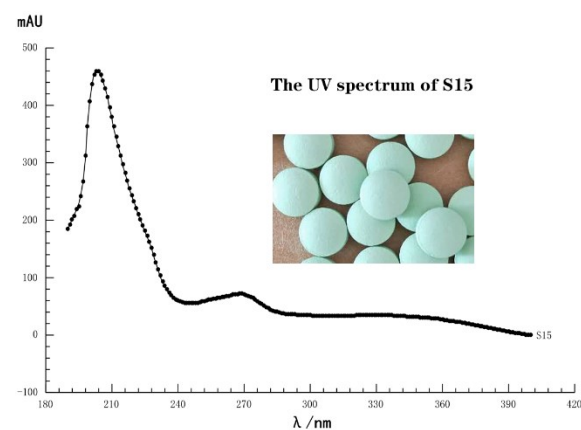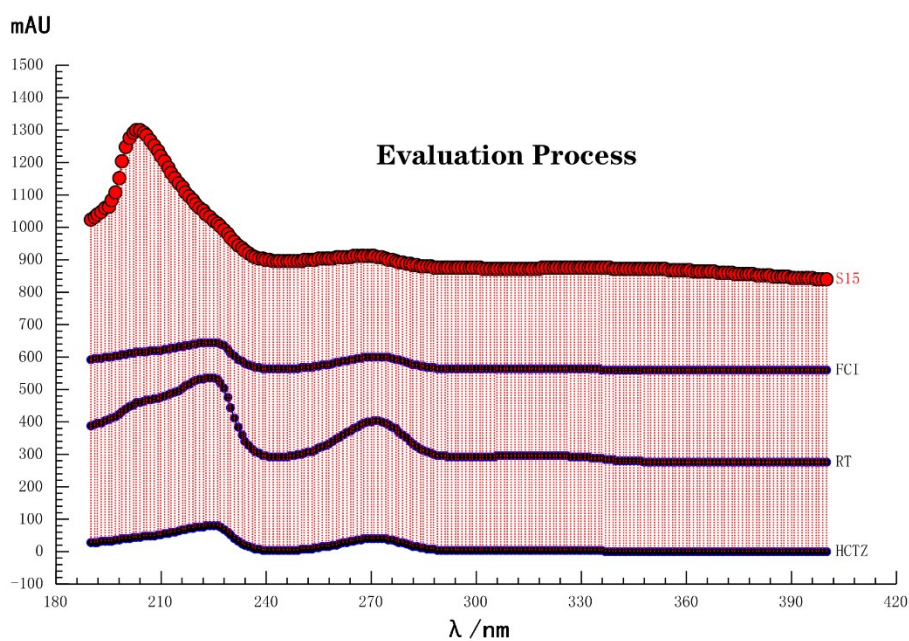

**Fig. S2** The UV spectra of HCTZ, RT and FCI samples and the UV spectrum of S15 at the 120min time point as well as the spectra of the evaluation process
